# Supplementary material
Source: PubMed Central journal article supplement (PMC6704595)
Supplement: IAI.00094-19-s0001.pdf [file IAI.00094-19-s0001.pdf]

**Participation of the serine protease Jonah66Ci in the *Drosophila* anti-nematode immune response**

**Shruti Yadav and Ioannis Eleftherianos**

**S1 Table.** Statistical analysis of relative abundance of *Jonah66Ci* estimated using RNAseq and qRT-PCR (Fig. 1A) in *Drosophila* larvae using one-way ANOVA with Tukey *post-hoc* test for individual comparisons.

| <b>Time-point</b>                      | <b>Comparisons</b>       | <b>Individual p values</b> |
|----------------------------------------|--------------------------|----------------------------|
| 6h                                     | RNAseq Sy vs qRT-PCR Sy  | 0.9669                     |
|                                        | RNAseq Ax vs qRt-PCR Ax  | 0.9998                     |
|                                        | RNAseq Sy vs RNAseq Ax   | 0.9431                     |
|                                        | qRT-PCR Sy vs qRT-PCR Ax | 0.9992                     |
| 24h                                    | RNAseq Sy vs qRT-PCR Sy  | 0.9835                     |
|                                        | RNAseq Ax vs qRt-PCR Ax  | >0.9999                    |
|                                        | RNAseq Sy vs RNAseq Ax   | >0.9999                    |
|                                        | qRT-PCR Sy vs qRT-PCR Ax | 0.9993                     |
| RNAseq                                 | Sy 6h vs Sy 24h          | 0.9995                     |
| qRT-PCR                                | Ax 6h vs Ax 24h          | 0.8498                     |
|                                        | Sy 6h vs Sy 24h          | 0.9987                     |
|                                        | Ax 6h vs Ax 24h          | 0.7912                     |
|                                        | <b>ANOVA Summary</b>     |                            |
| F                                      |                          | 0.94                       |
| P value                                |                          | 0.5103                     |
| P value summary                        |                          | ns                         |
| Significant diff. among means (P<0.05) |                          | No                         |
| R square                               |                          | 0.34                       |

*ns: non-significant*

**S2 Table.** Statistical analysis of *Jonah66Ci* gene expression in *Drosophila* larvae (Fig. 1B) using one-way ANOVA and Tukey *post-hoc* test.

| <b>Treatment/Method</b>                   | <b>Comparisons</b> | <b>p value</b> |
|-------------------------------------------|--------------------|----------------|
| Gut 6h                                    | C vs Sy            | 0.0190         |
|                                           | C vs Ax            | 0.3487         |
|                                           | Sy vs Ax           | 0.9422         |
| Gut 24                                    | C vs Sy            | >0.9999        |
|                                           | C vs Ax            | 0.4192         |
|                                           | Sy vs Ax           | 0.2697         |
| Gut-C                                     | 6h vs 24h          | 0.9384         |
| Gut-Sy                                    |                    | 0.0073         |
| Gut-Ax                                    |                    | 0.0452         |
| <b>ANOVA Summary</b>                      |                    |                |
| F                                         |                    | 11             |
| P value                                   |                    | <0.0001        |
| P value summary                           |                    | ****           |
| Significant diff. among means<br>(P<0.05) |                    | Yes            |
| R square                                  |                    | 0.79           |

**S3 Table.** Comparison of survival curves of *Drosophila* larvae (Fig. 2B) using Log-rank (Mantel-Cox) test.

| <b>Comparisons</b>                         | <b><i>p</i> values</b> |
|--------------------------------------------|------------------------|
| <i>yw</i> C vs <i>Jonah66Ci</i> C          | >0.9999                |
| <i>yw</i> Sy vs <i>Jonah66Ci</i> Sy        | 0.0801                 |
| <i>yw</i> Ax vs <i>Jonah66ci</i> Ax        | 0.0028                 |
| <i>yw</i> C vs <i>yw</i> Sy                | <0.0001                |
| <i>yw</i> C vs <i>yw</i> Ax                | <0.0001                |
| <i>yw</i> Sy vs <i>yw</i> Ax               | 0.3795                 |
| <i>Jonah66Ci</i> C vs <i>Jonah66Ci</i> Sy  | <0.0001                |
| <i>Jonah66Ci</i> C vs <i>Jonah66Ci</i> Ax  | <0.0001                |
| <i>Jonah66Ci</i> Sy vs <i>Jonah66Ci</i> Ax | 0.6637                 |
| <b>Log-rank (Mantel-Cox) test</b>          |                        |
| Chi Square                                 | 137                    |
| df                                         | 5                      |
| P value                                    | <0.0001                |
| P value summary                            | ****                   |
| Significant?                               | Yes                    |

**S4 Table.** Statistical analysis of AMP gene expression in *Drosophila* larvae (Fig. 3A-D) using one-way ANOVA and Tukey *post-hoc* test.

|                                        |                        | <b><i>Attacin</i></b> | <b><i>Drosomycin</i></b> | <b><i>Puckered</i></b> | <b><i>TOT-A</i></b> |
|----------------------------------------|------------------------|-----------------------|--------------------------|------------------------|---------------------|
| yw 6h                                  | C vs Sy                | >0.9999               | >0.9999                  | >0.9999                | 0.6064              |
| yw 6h                                  | C vs Ax                | >0.9999               | >0.9999                  | >0.9999                | 0.9948              |
| yw 6h                                  | Sy vs Ax               | >0.9999               | >0.9999                  | 0.9389                 | 0.9262              |
| yw 24h                                 | C vs Sy                | <0.0001               | 0.9777                   | >0.9999                | >0.9999             |
| yw 24h                                 | C vs Ax                | 0.9996                | 0.5999                   | 0.9974                 | 0.9933              |
| yw 24h                                 | Sy vs Ax               | <0.0001               | 0.9972                   | 0.9982                 | 0.9967              |
| yw C                                   | 6h vs 24h              | >0.9999               | 0.9963                   | >0.9999                | 0.9999              |
| yw Sy                                  | 6h vs 24h              | <0.0001               | >0.9999                  | >0.9999                | 0.6850              |
| yw Ax                                  | 6h vs 24h              | 0.9988                | 0.9974                   | 0.9918                 | 0.9681              |
| <i>Jonah66Ci</i> 6h                    | C vs Sy                | >0.9999               | >0.9999                  | 0.9926                 | >0.9999             |
| <i>Jonah66Ci</i> 6h                    | C vs Ax                | >0.9999               | >0.9999                  | >0.9999                | >0.9999             |
| <i>Jonah66Ci</i> 6h                    | Sy vs Ax               | >0.9999               | >0.9999                  | 0.9852                 | >0.9999             |
| <i>Jonah66Ci</i> 24h                   | C vs Sy                | 0.5209                | 0.9869                   | >0.9999                | >0.9999             |
| <i>Jonah66Ci</i> 24h                   | C vs Ax                | >0.9999               | >0.9999                  | >0.9999                | >0.9999             |
| <i>Jonah66Ci</i> 24h                   | Sy vs Ax               | 0.5205                | 0.9873                   | >0.9999                | >0.9999             |
| <i>Jonah66Ci</i> C                     | 6h vs 24h              | >0.9999               | >0.9999                  | >0.9999                | 0.9995              |
| <i>Jonah66Ci</i> Sy                    | 6h vs 24h              | 0.5201                | 0.9949                   | 0.9910                 | 0.9610              |
| <i>Jonah66Ci</i> Ax                    | 6h vs 24h              | >0.9999               | >0.9999                  | >0.9999                | 0.9998              |
| C 6h                                   |                        | >0.9999               | >0.9999                  | >0.9999                | 0.9922              |
| Sy 6h                                  | <i>yw vs Jonah66Ci</i> | >0.9999               | 0.9981                   | 0.4203                 | 0.9999              |
| Ax 6h                                  |                        | >0.9999               | 0.9972                   | 0.9879                 | >0.9999             |
| C 24h                                  |                        | >0.9999               | >0.9999                  | 0.9997                 | >0.9999             |
| Sy 24h                                 | <i>yw vs Jonah66Ci</i> | <0.0001               | >0.9999                  | 0.9941                 | >0.9999             |
| Ax 24h                                 |                        | 0.9998                | 0.6763                   | >0.9999                | 0.9999              |
| <b>ANOVA</b>                           |                        | <b>Summary</b>        |                          |                        |                     |
| F                                      |                        | 7                     | 0.87                     | 1.1                    | 0.85                |
| P value                                |                        | <0.0001               | 0.5797                   | 0.3832                 | 0.5999              |
| P value summary                        |                        | ****                  | ns                       | ns                     | ns                  |
| Significant diff. among means (P<0.05) |                        | Yes                   | No                       | No                     | No                  |
| R square                               |                        | 0.88                  | 0.25                     | 0.35                   | 0.3                 |

*ns*: non-significant

**S5 Table.** Statistical analysis of AMP gene expression in *Drosophila* larvae (Fig. 4A-D) using one-way ANOVA and Tukey *post-hoc* test.

|                                        |                        | <i>Drosomycin</i> | <i>Defensin</i> | <i>Diptericin</i> | <i>Cecropin</i> |
|----------------------------------------|------------------------|-------------------|-----------------|-------------------|-----------------|
| yw gut                                 | C vs Sy                | 0.0006            | >0.9999         | 0.4652            | >0.9999         |
|                                        | C vs Ax                | >0.9999           | >0.9999         | >0.9999           | >0.9999         |
|                                        | Sy vs Ax               | 0.0005            | >0.9999         | 0.4683            | >0.9999         |
| yw larvae                              | C vs Sy                | 0.6483            | >0.9999         | 0.0203            | 0.8635          |
|                                        | C vs Ax                | 0.9994            | >0.9999         | >0.9999           | >0.9999         |
|                                        | Sy vs Ax               | 0.9924            | >0.9999         | 0.0198            | 0.9124          |
| <i>Jonah66i</i> gut                    | C vs Sy                | >0.9999           | >0.9999         | >0.9999           | 0.0002          |
|                                        | C vs Ax                | >0.9999           | >0.9999         | >0.9999           | >0.9999         |
|                                        | Sy vs Ax               | >0.9999           | >0.9999         | >0.9999           | 0.0001          |
| <i>Jonah66i</i> larvae                 | C vs Sy                | >0.9999           | 0.0152          | >0.9999           | >0.9999         |
|                                        | C vs Ax                | >0.9999           | >0.9999         | >0.9999           | >0.9999         |
|                                        | Sy vs Ax               | >0.9999           | 0.0817          | >0.9999           | >0.9999         |
| Gut- C                                 | <i>yw vs Jonah66Ci</i> | >0.9999           | >0.9999         | >0.9999           | >0.9999         |
| Gut- Sy                                |                        | 0.0004            | >0.9999         | 0.6204            | 0.0002          |
| Gut- Ax                                |                        | >0.9999           | >0.9999         | >0.9999           | >0.9999         |
| Larvae- C                              | <i>yw vs Jonah66Ci</i> | >0.9999           | >0.9999         | >0.9999           | >0.9999         |
| Larvae- Sy                             |                        | 0.5225            | 0.0188          | 0.0441            | 0.9882          |
| Larvae- Ax                             |                        | 0.9985            | >0.9999         | >0.9999           | >0.9999         |
| yw-C                                   | gut vs larvae          | >0.9999           | >0.9999         | >0.9999           | >0.9999         |
| yw-Sy                                  |                        | 0.0391            | >0.9999         | 0.9426            | 0.9840          |
| yw-Ax                                  |                        | 0.9998            | >0.9999         | >0.9999           | >0.9999         |
| <i>Jonah66i</i> -C                     | gut vs larvae          | >0.9999           | >0.9999         | >0.9999           | >0.9999         |
| <i>Jonah66i</i> -Sy                    |                        | >0.9999           | 0.0171          | >0.9999           | 0.0005          |
| <i>Jonah66i</i> -Ax                    |                        | >0.9999           | >0.9999         | >0.9999           | >0.9999         |
| <b>ANOVA</b>                           |                        | <b>Summary</b>    |                 |                   |                 |
| F                                      |                        | 4.5               | 2.6             | 2.8               | 5.4             |
| P value                                |                        | 0.0002            | 0.0165          | 0.0104            | 0.0001          |
| P value summary                        |                        | ***               | *               | *                 | ***             |
| Significant diff. among means (P<0.05) |                        | Yes               | Yes             | Yes               | Yes             |
| R square                               |                        | 0.55              | 0.44            | 0.49              | 0.56            |

**S6 Table.** Statistical analysis of *Wingless* gene expression and number of PH3 positive cells in *Drosophila* larvae (Fig. 5A, C) using one-way ANOVA and Tukey *post-hoc* test.

|                                        | <b>Comparison</b>      | <b><i>Wingless</i></b> | <b>PH3</b> |
|----------------------------------------|------------------------|------------------------|------------|
| <i>yw</i>                              | C vs Sy                | >0.9999                | 0.0848     |
|                                        | C vs Ax                | 0.9887                 | 0.0278     |
|                                        | Sy vs Ax               | 0.9943                 | >0.9999    |
| <i>Jonah66Ci</i>                       | C vs Sy                | 0.9985                 | >0.9999    |
|                                        | C vs Ax                | 0.1648                 | 0.0131     |
|                                        | Sy vs Ax               | 0.1377                 | 0.0148     |
| C                                      | <i>yw vs Jonah66Ci</i> | 0.0084                 | 0.0008     |
| Sy                                     |                        | 0.0086                 | 0.7032     |
| Ax                                     |                        | 0.2663                 | 0.2203     |
| <b>ANOVA Summary</b>                   |                        |                        |            |
| F                                      |                        | 8.8                    | 7          |
| P value                                |                        | 0.0006                 | 0.0002     |
| P value summary                        |                        | ***                    | ***        |
| Significant diff. among means (P<0.05) |                        | Yes                    | Yes        |
| R square                               |                        | 0.76                   | 0.52       |

**S7 Table.** Statistical analysis of number of EEs in *Drosophila* larvae (Fig. 6B) using one-way ANOVA and Tukey *post-hoc* test.

|                                           | <b>Comparison</b>      | <b>EE</b> |
|-------------------------------------------|------------------------|-----------|
| <i>yw</i>                                 | C vs Sy                | 0.0286    |
|                                           | C vs Ax                | 0.9993    |
|                                           | Sy vs Ax               | 0.0179    |
| <i>Jonah66Ci</i>                          | C vs Sy                | 0.0182    |
|                                           | C vs Ax                | 0.0131    |
|                                           | Sy vs Ax               | >0.9999   |
| C                                         | <i>yw vs Jonah66Ci</i> | 0.0048    |
| Sy                                        |                        | 0.1018    |
| Ax                                        |                        | 0.9798    |
| <b>ANOVA Summary</b>                      |                        |           |
| F                                         |                        | 6.7       |
| P value                                   |                        | 0.0002    |
| P value summary                           |                        | ***       |
| Significant diff. among means<br>(P<0.05) |                        | Yes       |
| R square                                  |                        | 0.51      |

**S8 Table.** Statistical analysis of number of *Esg* positive cells in *Drosophila* larvae (Fig. 7B) using one-way ANOVA and Tukey *post-hoc* test.

|                                           | <b>Comparison</b>      | <b>Esg</b>                  |
|-------------------------------------------|------------------------|-----------------------------|
| <i>yw</i>                                 | C vs Sy                | 0.3862                      |
|                                           | C vs Ax                | 0.9829                      |
|                                           | Sy vs Ax               | 0.1510                      |
| <i>Jonah66Ci</i>                          | C vs Sy                | 0.0559                      |
|                                           | C vs Ax                | 0.1266                      |
|                                           | Sy vs Ax               | 0.9997                      |
| C<br>Sy<br>Ax                             | <i>yw vs Jonah66Ci</i> | 0.3954<br>0.0539<br>>0.9999 |
| <b>ANOVA Summary</b>                      |                        |                             |
| F                                         |                        | 3.6                         |
| P value                                   |                        | 0.0125                      |
| P value summary                           |                        | *                           |
| Significant diff. among means<br>(P<0.05) |                        | Yes                         |
| R square                                  |                        | 0.41                        |



**S9 Table.** Statistical analysis of NO, ROS and feeding (food-dye) levels in *Drosophila* larvae (Fig. 8A-C) using one-way ANOVA and Tukey *post-hoc* test.

|                                        | <b>Comparison</b>      | <b>NO</b> | <b>ROS</b> | <b>Food-dye</b> |
|----------------------------------------|------------------------|-----------|------------|-----------------|
| <i>yw</i>                              | C vs Sy                | 0.3827    | 0.9979     | 0.7267          |
|                                        | C vs Ax                | 0.3672    | 0.9994     | 0.3563          |
|                                        | Sy vs Ax               | 0.0320    | 0.9715     | 0.0204          |
| <i>Jonah66Ci</i>                       | C vs Sy                | >0.9999   | 0.9948     | >0.9999         |
|                                        | C vs Ax                | >0.9999   | 0.8083     | 0.8846          |
|                                        | Sy vs Ax               | >0.9999   | 0.9736     | 0.9415          |
| C                                      | <i>yw vs Jonah66Ci</i> | 0.2060    | 0.9871     | >0.9999         |
| Sy                                     |                        | 0.0123    | 0.9995     | 0.8383          |
| Ax                                     |                        | >0.9999   | 0.9996     | 0.0249          |
| <b>ANOVA Summary</b>                   |                        |           |            |                 |
| F                                      |                        | 6.2       | 4.2        | 2.7             |
| P value                                |                        | 0.0071    | 0.8230     | 0.0824          |
| P value summary                        |                        | **        | ns         | ns              |
| Significant diff. among means (P<0.05) |                        | Yes       | No         | No              |
| R square                               |                        | 0.76      | 0.15       | 0.55            |

*ns: non-significant*
